# Supplementary material for: Mesoscale dynamics and transport in the North Brazil Current as revealed by the EUREC4A-OA experiment
Source: Copernicus journal article supplement (doi:10.5194/os-21-1849-2025), 2025-09-01
Supplement: Supplementary file 1 [file os-21-1849-2025-supplement.zip]

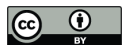

*Supplement of*

**Mesoscale dynamics and transport in the North Brazil Current as revealed by the EUREC4A-OA experiment**

**Yan Barabinot et al.**

*Correspondence to:* Yan Barabinot ([yan.barabinot@lmd.ipsl.fr](mailto:yan.barabinot@lmd.ipsl.fr))

- [os-21-1849-2025-supplement-title-page.pdf](#)
- [egusphere-2025-586-supplement-version1](#)
  - [floats.mp4](#)

The copyright of individual parts of the supplement might differ from the article licence.
